# Supplementary material for: Multi-technique structural analysis of zinc carboxylates (soaps)
Source: Royal Society of Chemistry journal article supplement (doi:10.1039/d3dt00184a), 2023-01-01
Supplement: d3dt00184a1.pdf [file d3dt00184a1.pdf]

## Supplementary Information for

### Multi-Technique Structural Analysis of Zinc Carboxylates (Soaps)

Molly Wagner,<sup>a,b,c</sup> Roberta Pigliapochi,<sup>a,d,e</sup> Valeria Di Tullio,<sup>f</sup> Jaclyn Catalano,<sup>g</sup> Nicholas Zumbulyadis<sup>a</sup> Silvia A. Centeno,<sup>d</sup> Xiaoling Wang,<sup>h</sup> Kuizhi Chen,<sup>g</sup> Ivan Hung,<sup>g</sup> Zhehong Gan,<sup>g</sup> Michael R. Dworzak,<sup>a</sup> Glenn P. A. Yap,<sup>a</sup> Cecil Dybowski<sup>a</sup>

Table S1: FTIR Bands for the series of zinc carboxylates

| Compound | Frequency of bands cm <sup>-1</sup> |                         |             |                            |                         |                         |                            |            |                        |
|----------|-------------------------------------|-------------------------|-------------|----------------------------|-------------------------|-------------------------|----------------------------|------------|------------------------|
|          | $\nu_s$<br>COO                      | $\nu_{as}$<br>COO       | $\Delta\nu$ | $\nu_{as}$ CH <sub>3</sub> | $\nu_s$ CH <sub>3</sub> | $\nu_s$ CH <sub>2</sub> | $\nu_{as}$ CH <sub>2</sub> | $\rho$ COO | $\rho$ CH <sub>2</sub> |
| ZnC8     | 1544,<br>1527 (s)                   | 1408,<br>1396<br>(m, b) | 136,<br>131 | 2956 (w,<br>b)             | 2870<br>(w)             | 2923,<br>2913<br>(w, b) | 2846 (w,<br>b)             | 551 (w)    | 746, 723<br>(m)        |
| ZnC9     | 1544,<br>1525<br>(vs)               | 1410,<br>1398<br>(m)    | 134,<br>127 | 2954 (m)                   | 2868<br>(w)             | 2919,<br>2913<br>(m, b) | 2846 (m,<br>b)             | 551 (w)    | 752, 744,<br>721 (m)   |
| ZnC10    | 1535<br>(vs)                        | 1396<br>(m)             | 139         | 2958,<br>2950 (w)          | 2868<br>(w)             | 2916<br>(m)             | 2848 (m)                   | 547 (w)    | 744, 723<br>(m)        |
| ZnC11    | 1542,<br>1529<br>(vs)               | 1408,<br>1398<br>(m)    | 134,<br>131 | 2954 (m)                   | 2869<br>(w)             | 2917 (s)                | 2848 (m)                   | 553 (w)    | 746, 736,<br>721 (m)   |
| ZnC12    | 1535<br>(vs)                        | 1408,<br>1394<br>(m, b) | 127,<br>141 | 2958,<br>2950 (m,<br>b)    | 2867<br>(w)             | 2916 (s)                | 2848 (m)                   | 549 (w)    | 742, 730,<br>723 (m)   |
| ZnC16    | 1537 (s)                            | 1396<br>(m, b)          | 141         | 2960,<br>2950 (w,<br>b)    | —                       | 2916<br>(m)             | 2846 (m)                   | 549 (w)    | 744, 723<br>(m)        |
| ZnC18    | 1537<br>(vs)                        | 1396<br>(m)             | 141         | 2958,<br>2950 (w,<br>b)    | —                       | 2916<br>(m)             | 2846 (m)                   | 549 (w)    | 744, 722<br>(m)        |
| ZnZ-C18  | 1542,<br>1525 (s)                   | 1408,<br>1398<br>(m, b) | 134,<br>127 | 2954 (w,<br>b)             | 2871<br>(w)             | 2918<br>(m)             | 2850 (m,<br>b)             | 549 (w)    | 742, 723<br>(m)        |
| ZnPiv    | 1550,<br>1521<br>(m)                | 1415<br>(m, b)          | 135,<br>106 | 2981,<br>2960 (w,<br>b)    | —                       | —                       | —                          | 547 (w)    | —                      |
| ZnAze    | 1544,<br>1529<br>(vs)               | 1405,<br>1392 (s)       | 139,<br>137 | —                          | —                       | 2923,<br>2906<br>(w)    | 2861,<br>2846 (w)          | 576 (w)    | 744, 723<br>(m)        |

(vs) Very Strong; (s) Strong; (m) Medium; (w) Weak; (b) Broad

<sup>a</sup> Department of Chemistry and Biochemistry, University of Delaware, Newark, Delaware 19716

<sup>b</sup> US Department of Energy, Ames Laboratory, Ames, Iowa 50010

<sup>c</sup> Department of Chemistry, Iowa State University, Ames, Iowa 50010

<sup>d</sup> Department of Scientific Research, The Metropolitan Museum of Art, New York, New York 10028

<sup>e</sup> Department of Physics, CUNY-City College of New York, New York, NY 10031, USA

<sup>f</sup> Institute of Heritage Science, National Council of Research, Rome, Italy 00016

<sup>g</sup> Department of Chemistry and Biochemistry, Montclair State University, Montclair, New Jersey

<sup>h</sup> National High Magnetic Field Laboratory, Tallahassee, Florida 32310

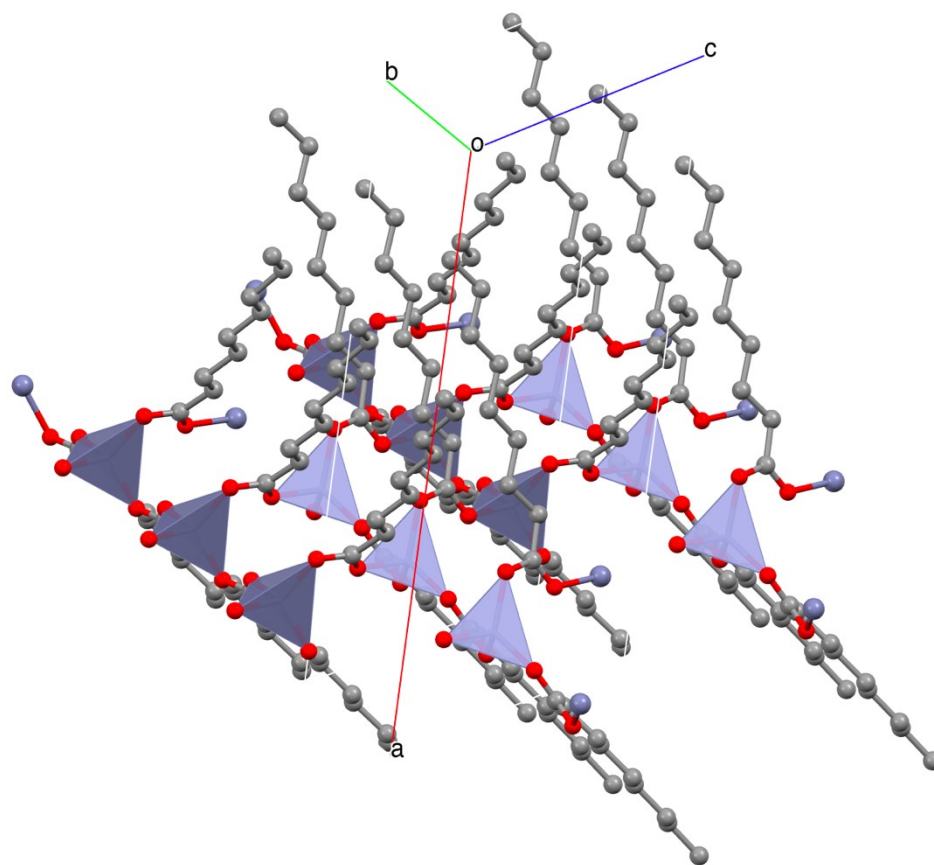

*Figure S1: Expanded packing diagram for ZnC9 indicating AB packing between layers of alternating Zn tetrahedra.*

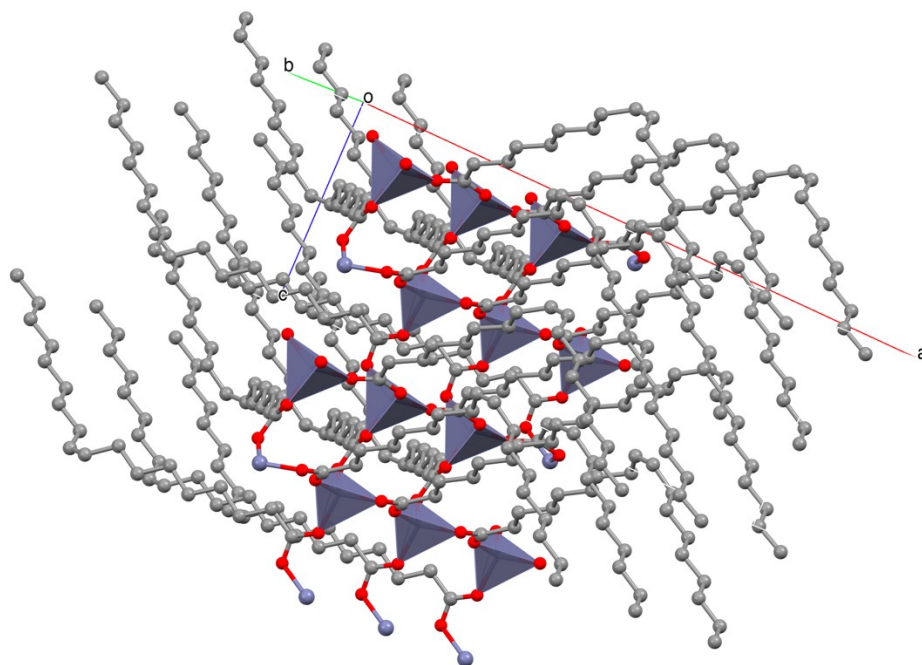

*Figure S2: Expanded packing diagram for ZnZ-C18 indicating AB packing between layers of alternating Zn tetrahedra.*

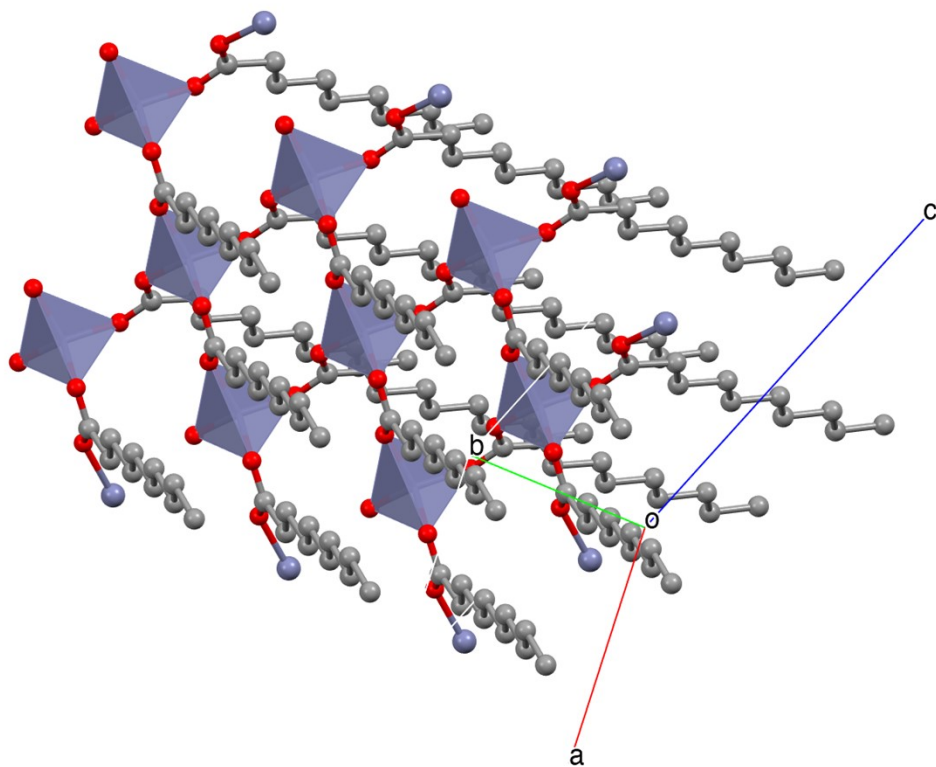

*Figure S3: Expanded packing diagram for ZnC10 indicating AB packing between layers of non-alternating tetrahedra.*

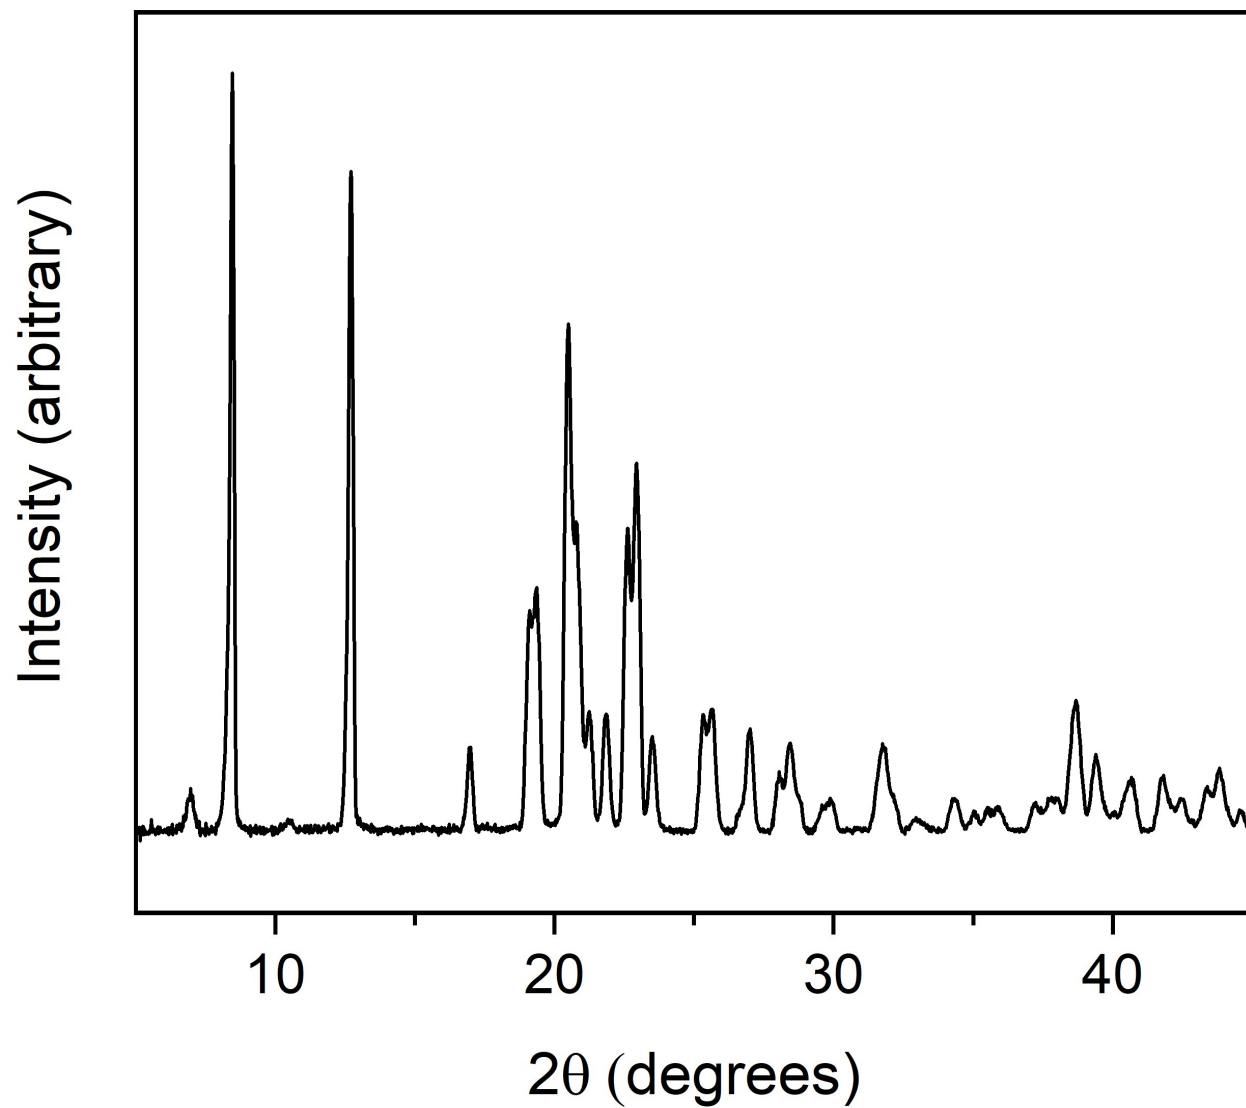

*Figure S4: Experimental PXRD pattern for ZnC8. Cu-K $\alpha$  radiation.*

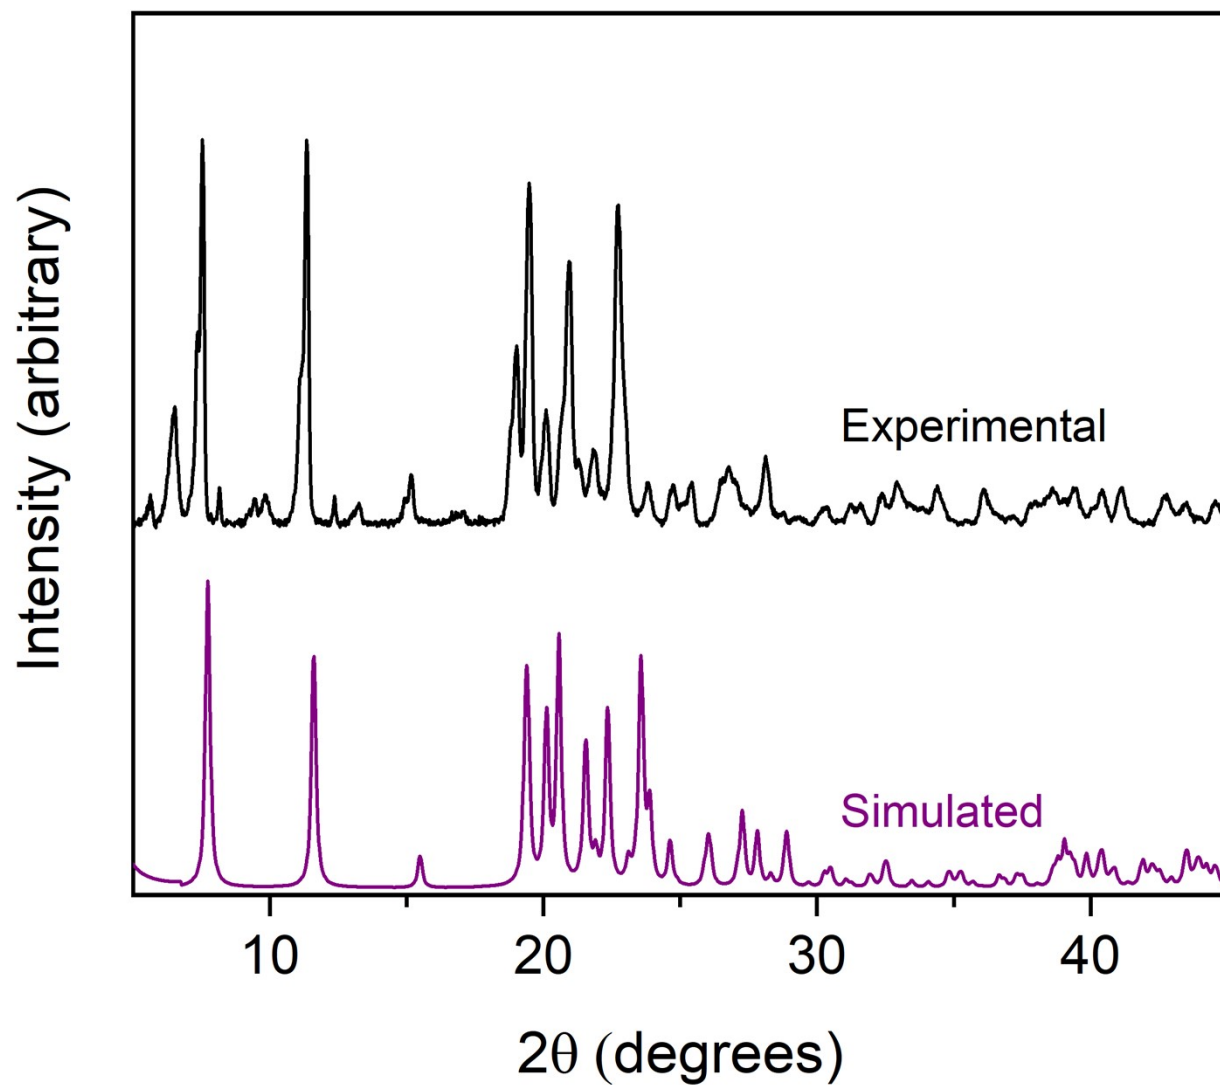

Figure S5: Experimental PXRD pattern for ZnC9 bulk (black, top) and simulated PXRD pattern from the ZnC9 single-crystal (purple, bottom.) Cu-K $\alpha$  radiation.

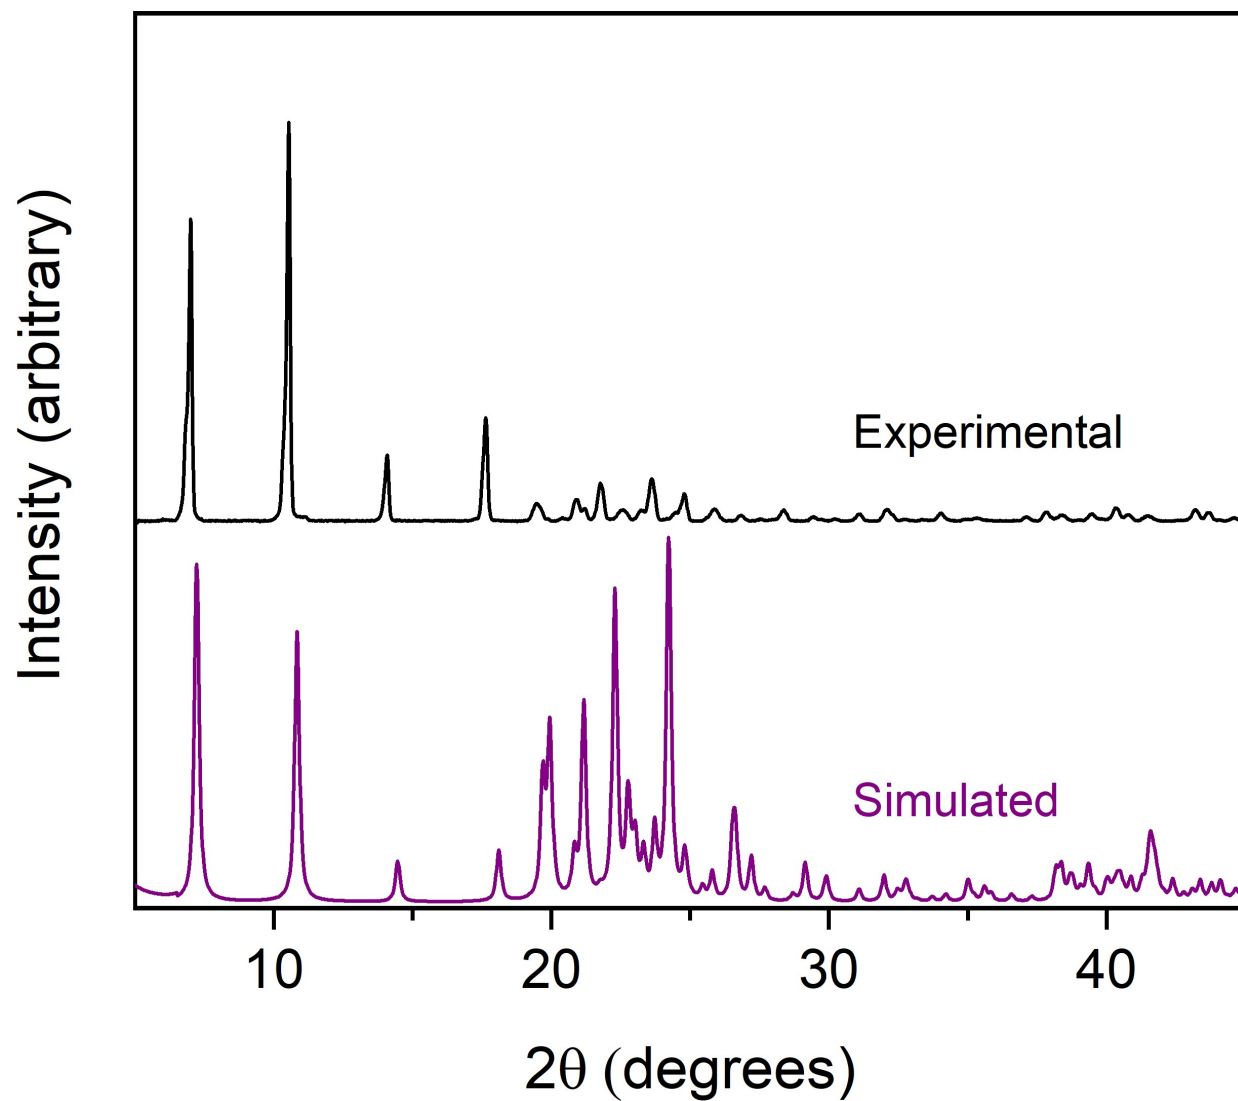

Figure S6: Experimental PXRD pattern for ZnC10 bulk (black, top) and simulated PXRD pattern from the ZnC10 single-crystal (purple, bottom.) Cu-K $\alpha$  radiation.

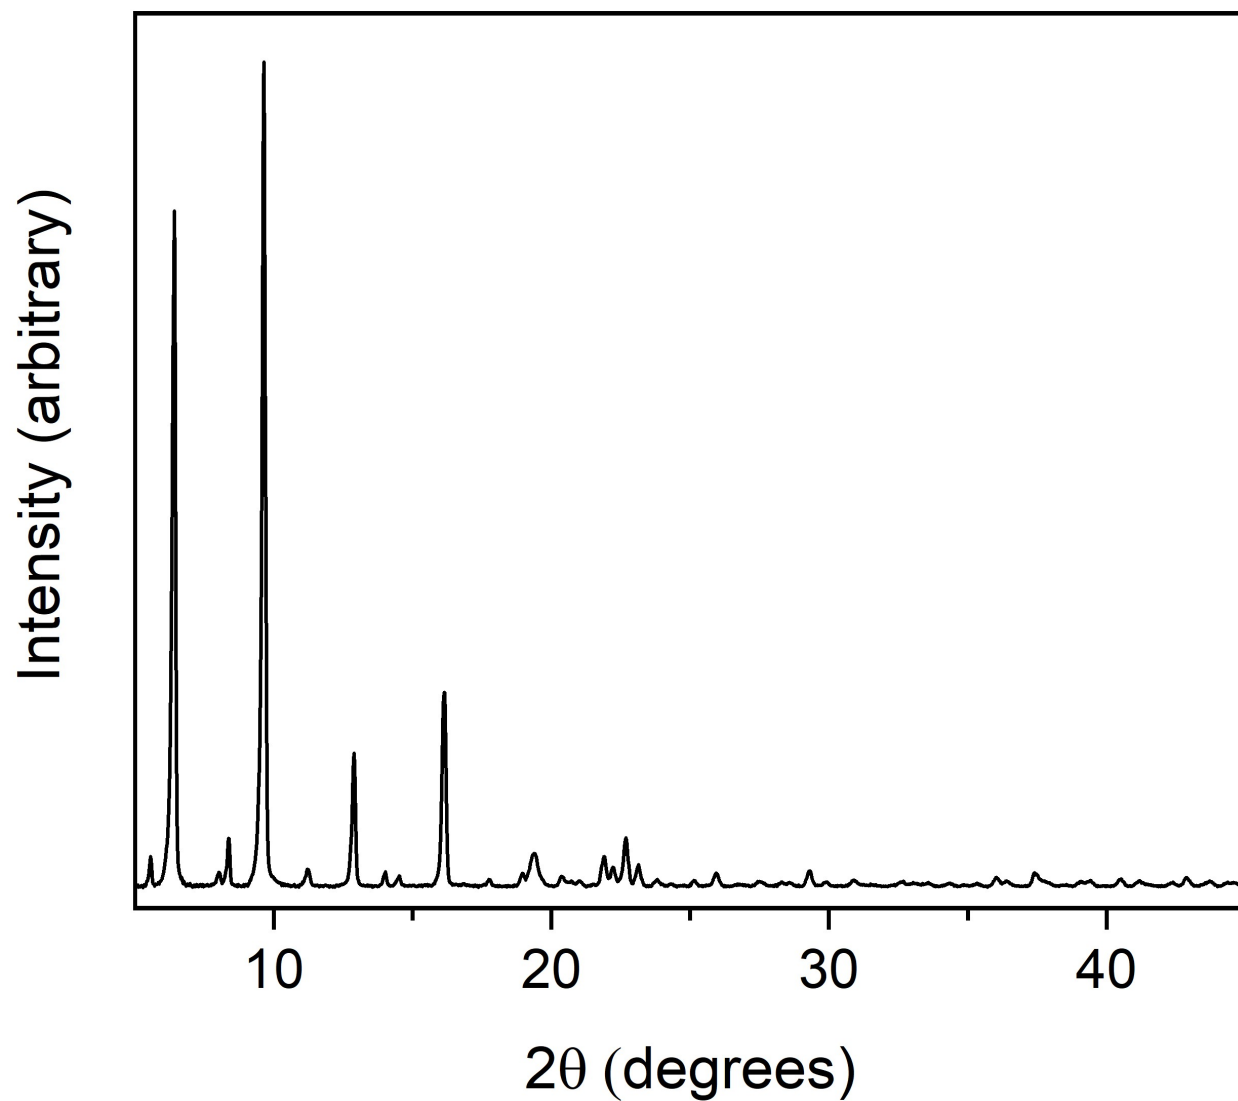

*Figure S7: Experimental PXRD pattern for ZnCl<sub>2</sub>. Cu-K $\alpha$  radiation.*



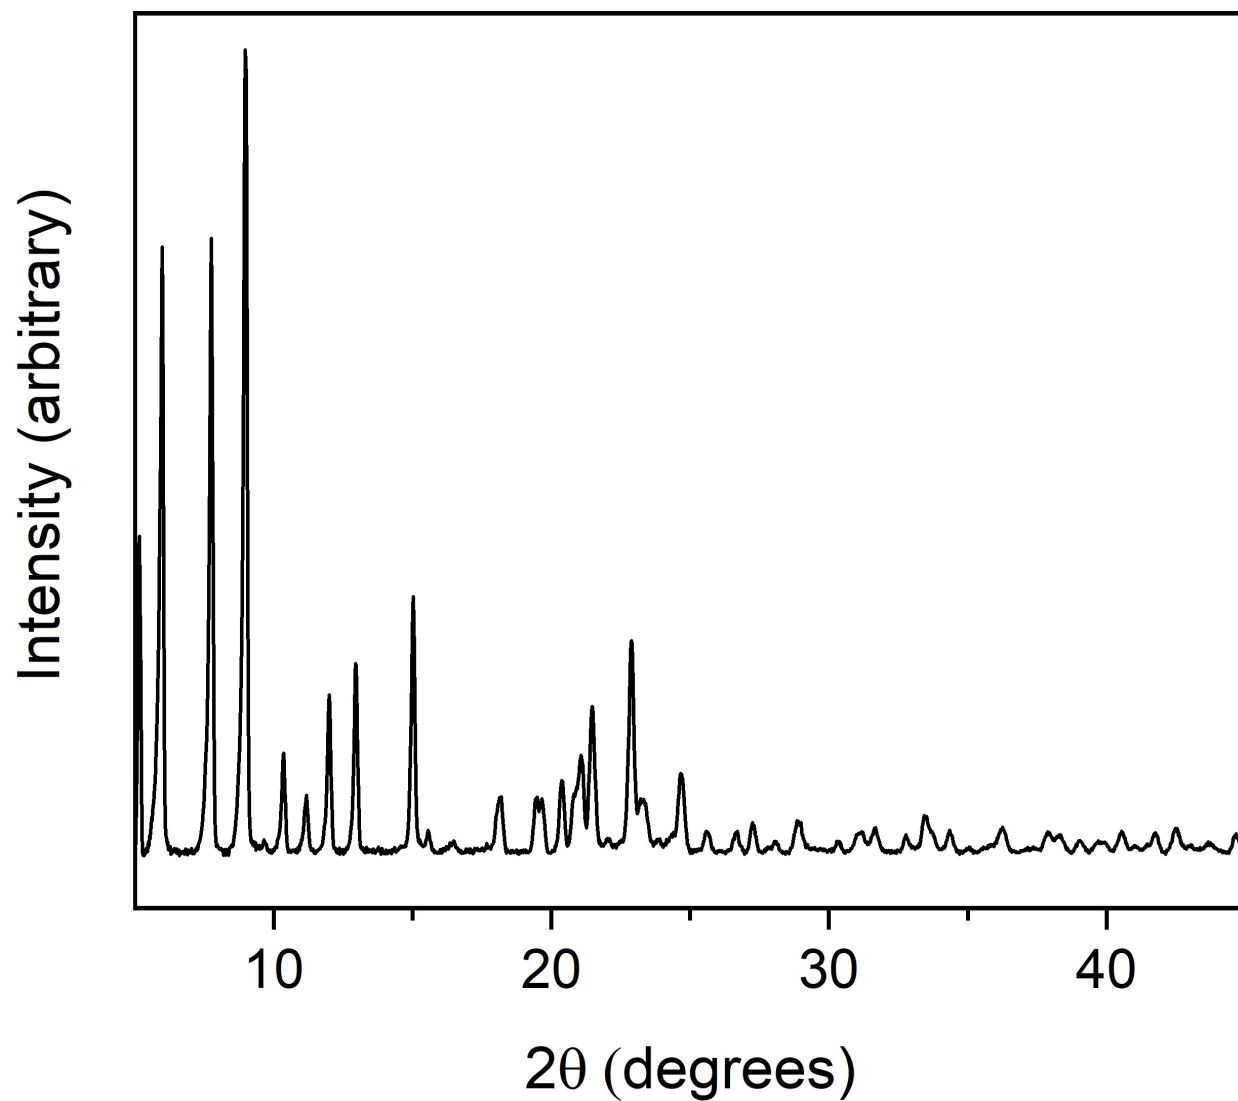

*Figure S8: Experimental PXRD pattern for ZnCl<sub>2</sub>. Cu-Kα radiation.*

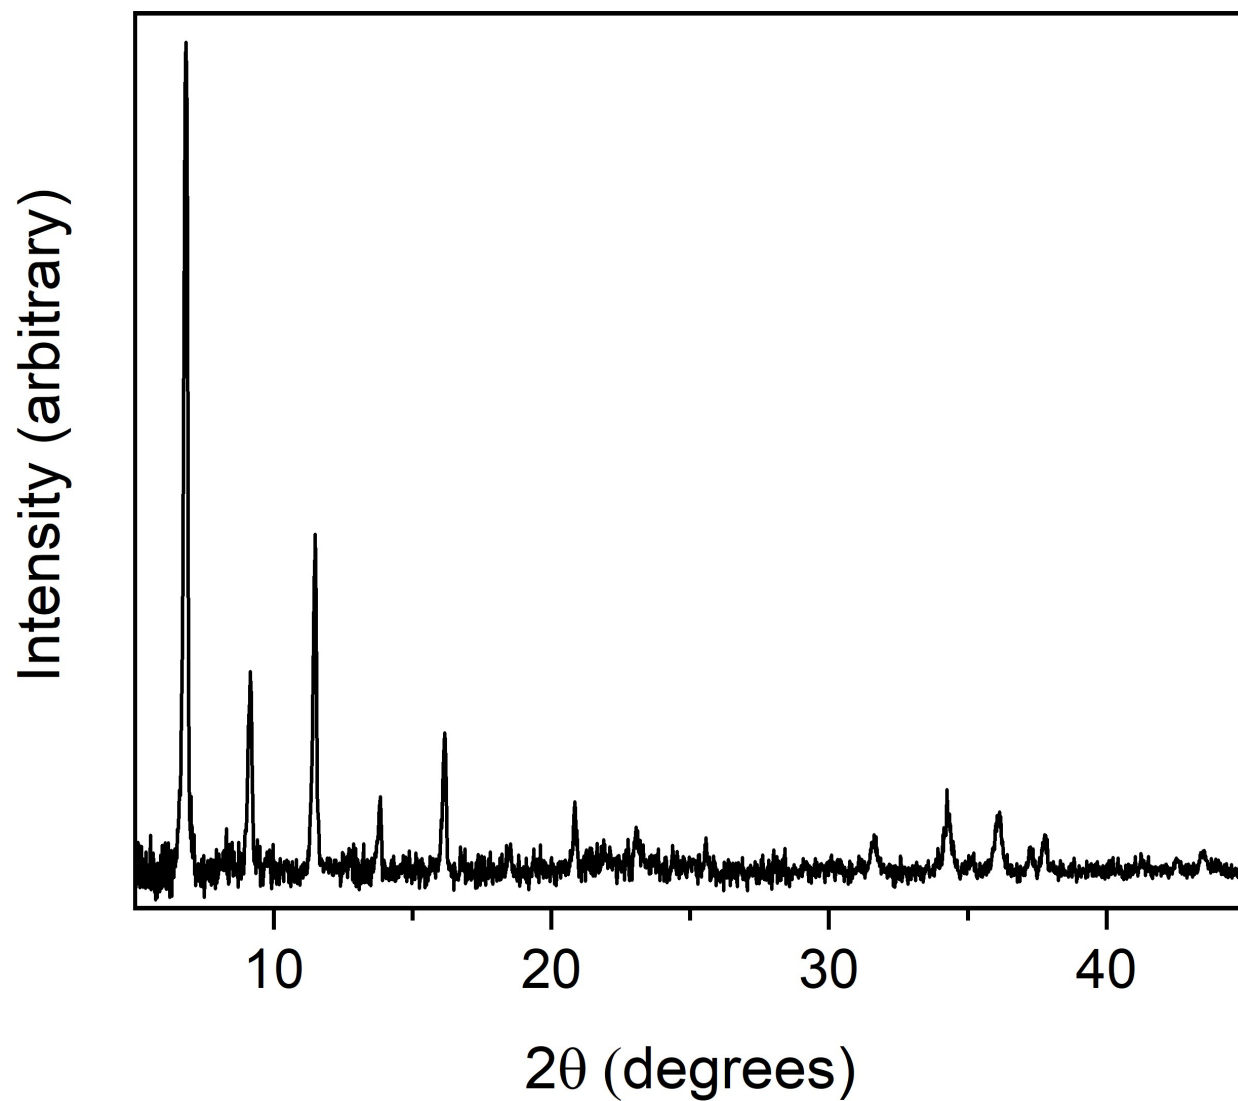

*Figure S9: Experimental PXRD pattern for ZnCl<sub>6</sub>. Cu-K $\alpha$  radiation.*

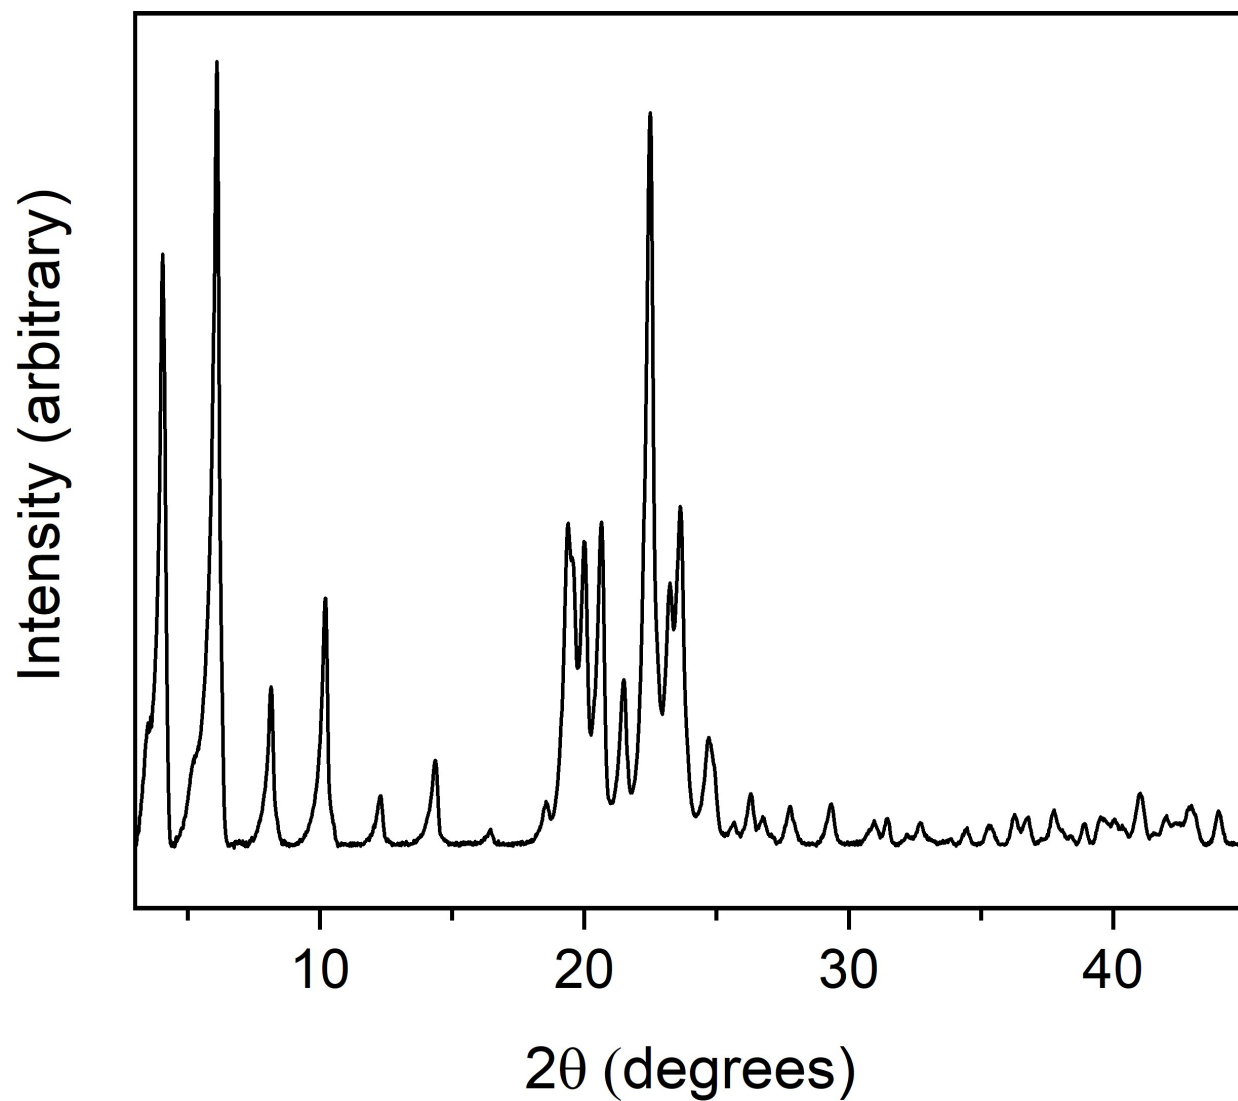

*Figure S10: Experimental PXRD pattern for ZnCl<sub>8</sub>. Cu-K $\alpha$  radiation.*

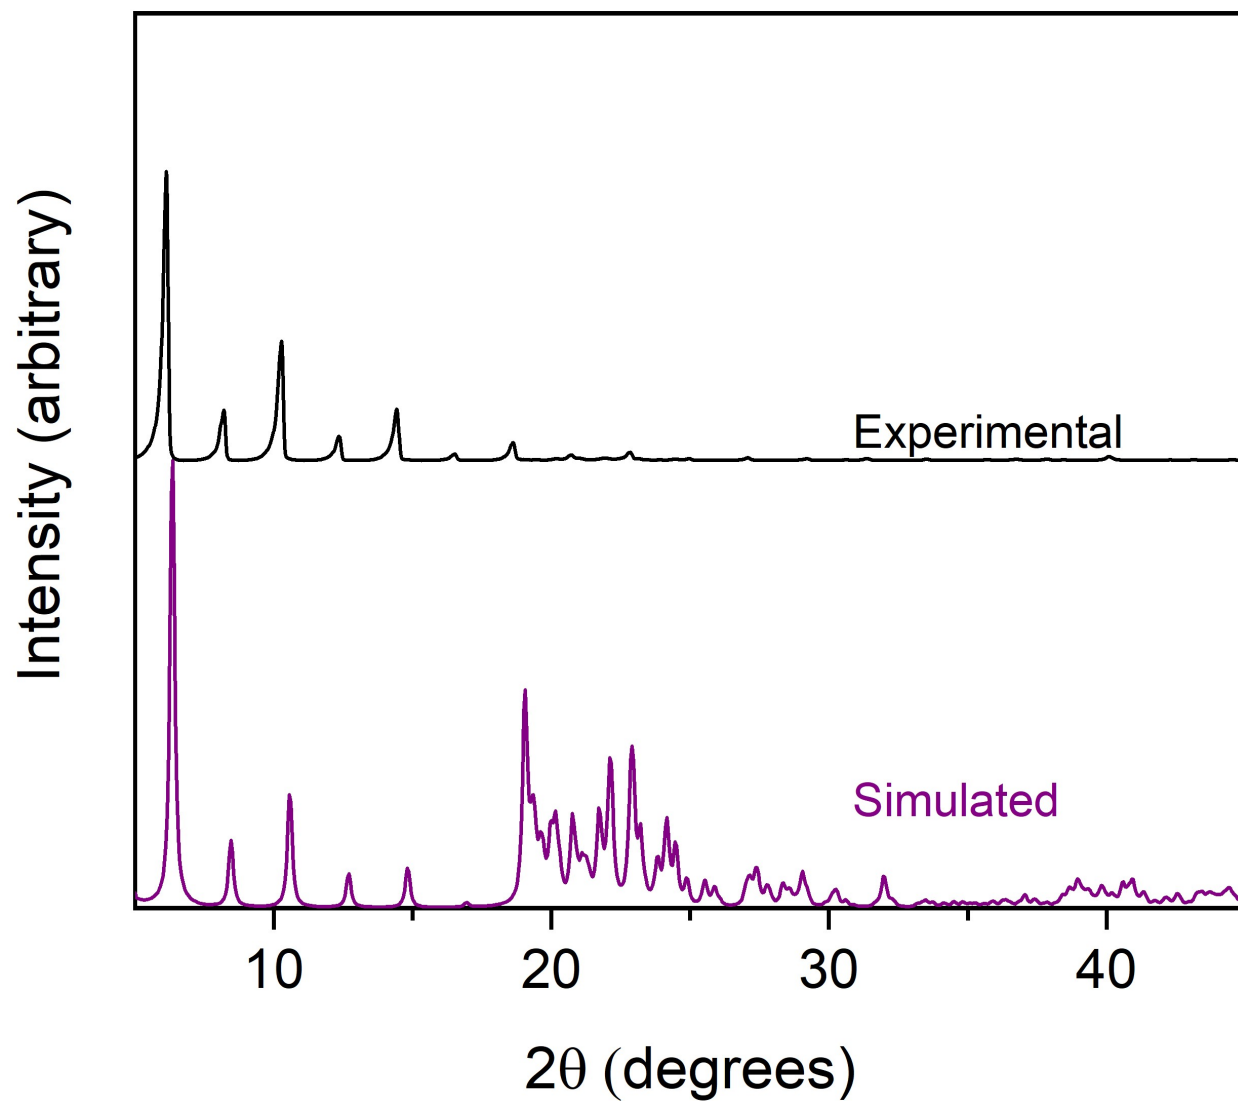

Figure S11: Experimental PXRD pattern for ZnZC18 bulk (black, top) and simulated PXRD pattern from the ZnZC18 single-crystal (purple, bottom.) Cu-K $\alpha$  radiation.

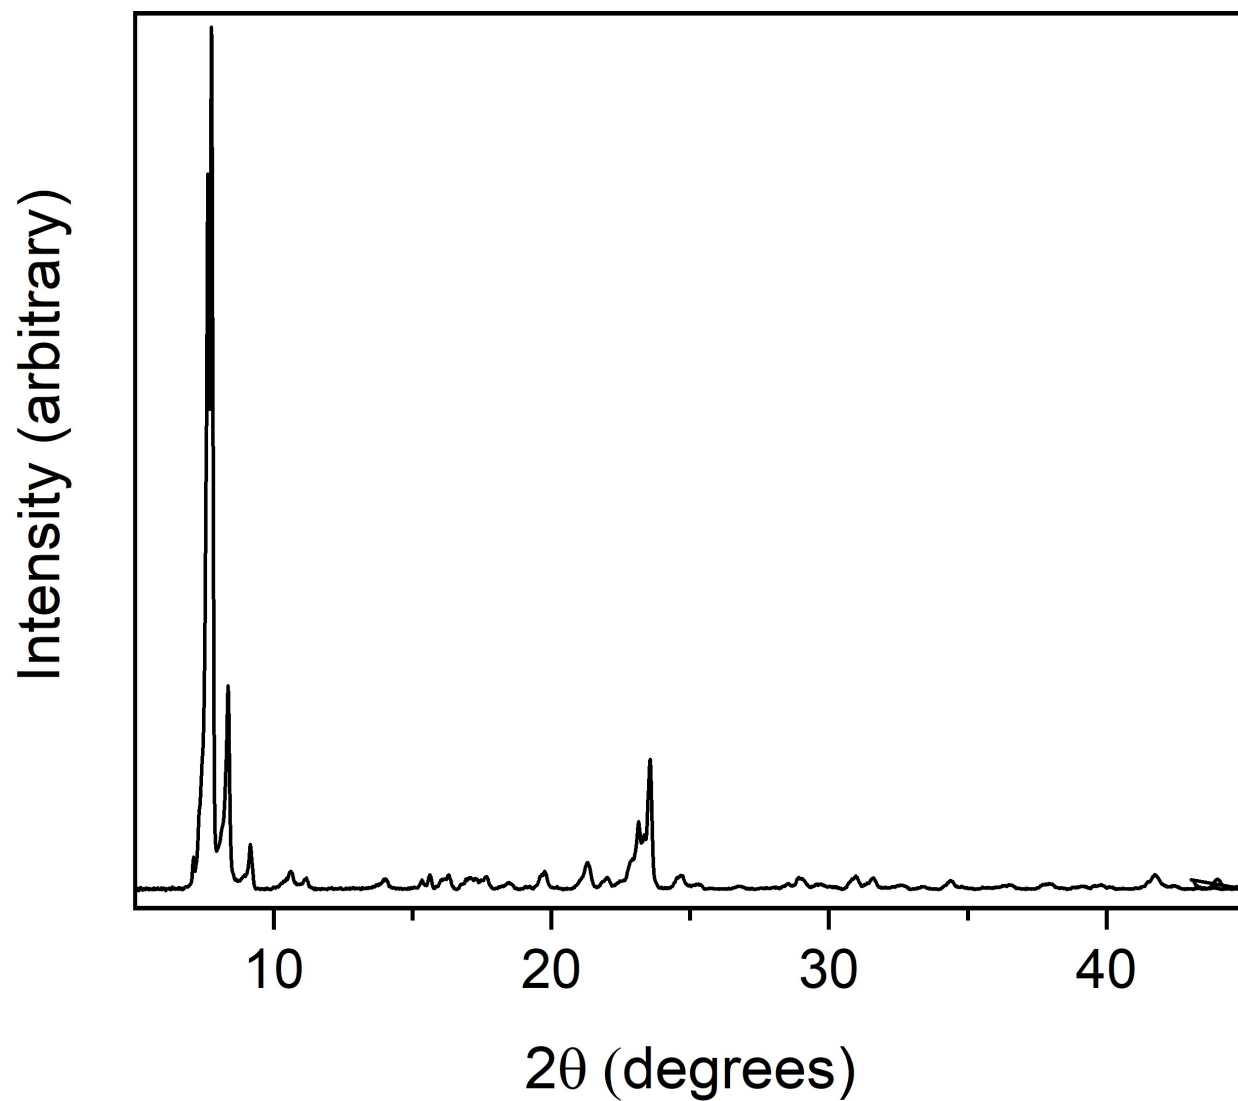

Figure S12: Experimental PXRD pattern for ZnPIV. Cu-K $\alpha$  radiation.

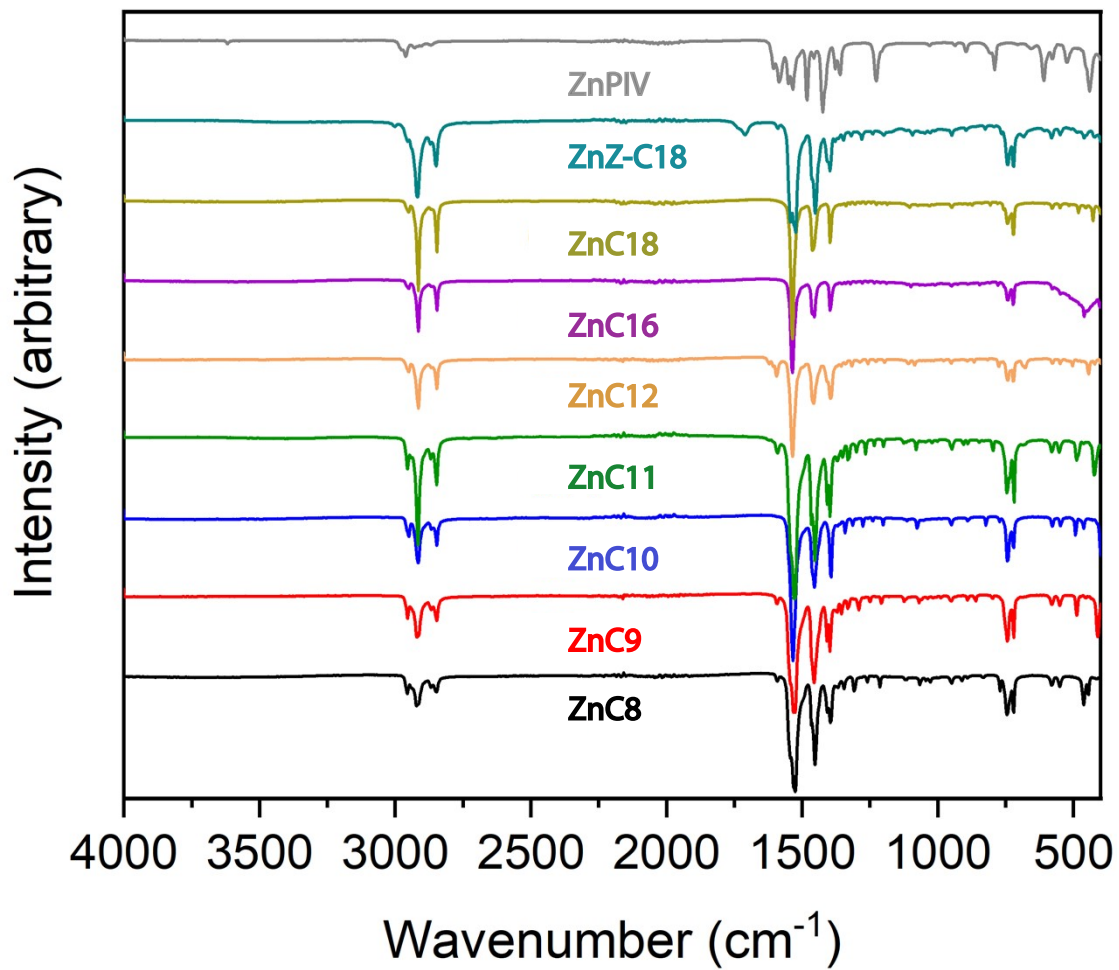

Figure S13: Full FTIR spectra for the carboxylate series.

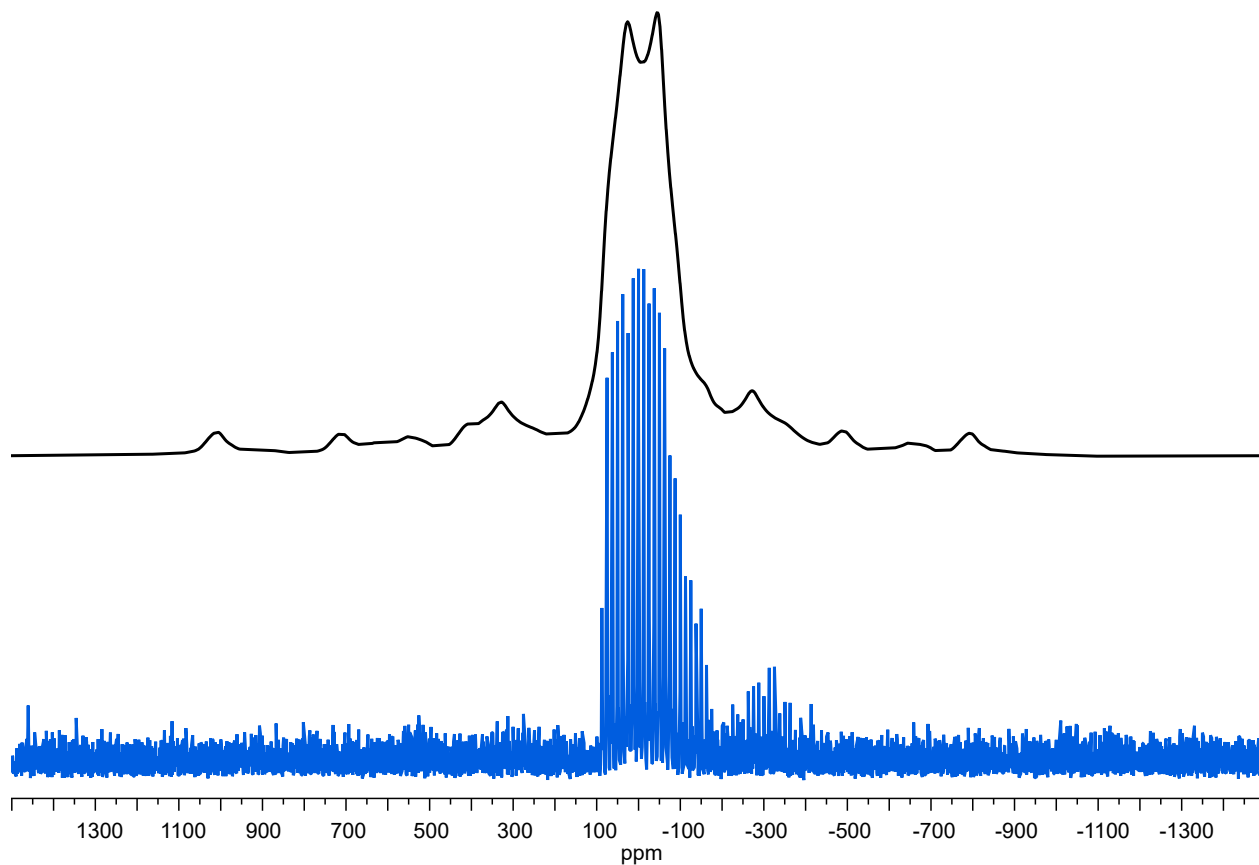

Figure S14:  $^{67}\text{Zn}$  spectra for ZnAZE. (Top, Black) Ssnake fitting parameters visualized in TopSpin; (Bottom, Blue) WURST-QCPMG spectrum at 15625 Hz MAS.  $B_0$  19.6 T

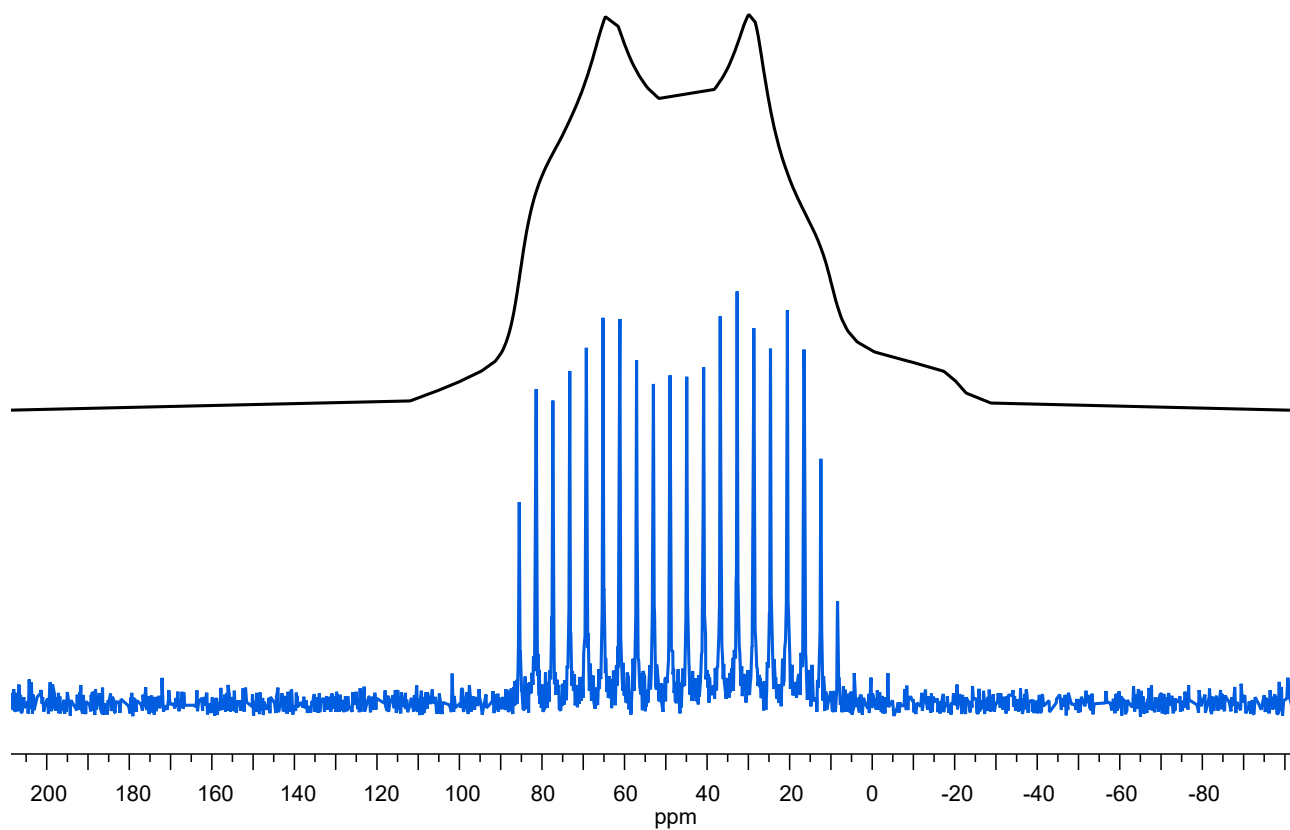

Figure S15:  $^{67}\text{Zn}$  spectra for ZnC9. (Top, Black) Ssnake fitting parameters visualized in TopSpin; (Bottom, Blue) WURST-QCPMG spectrum at 15625 Hz MAS.  $B_0$  35.2 T



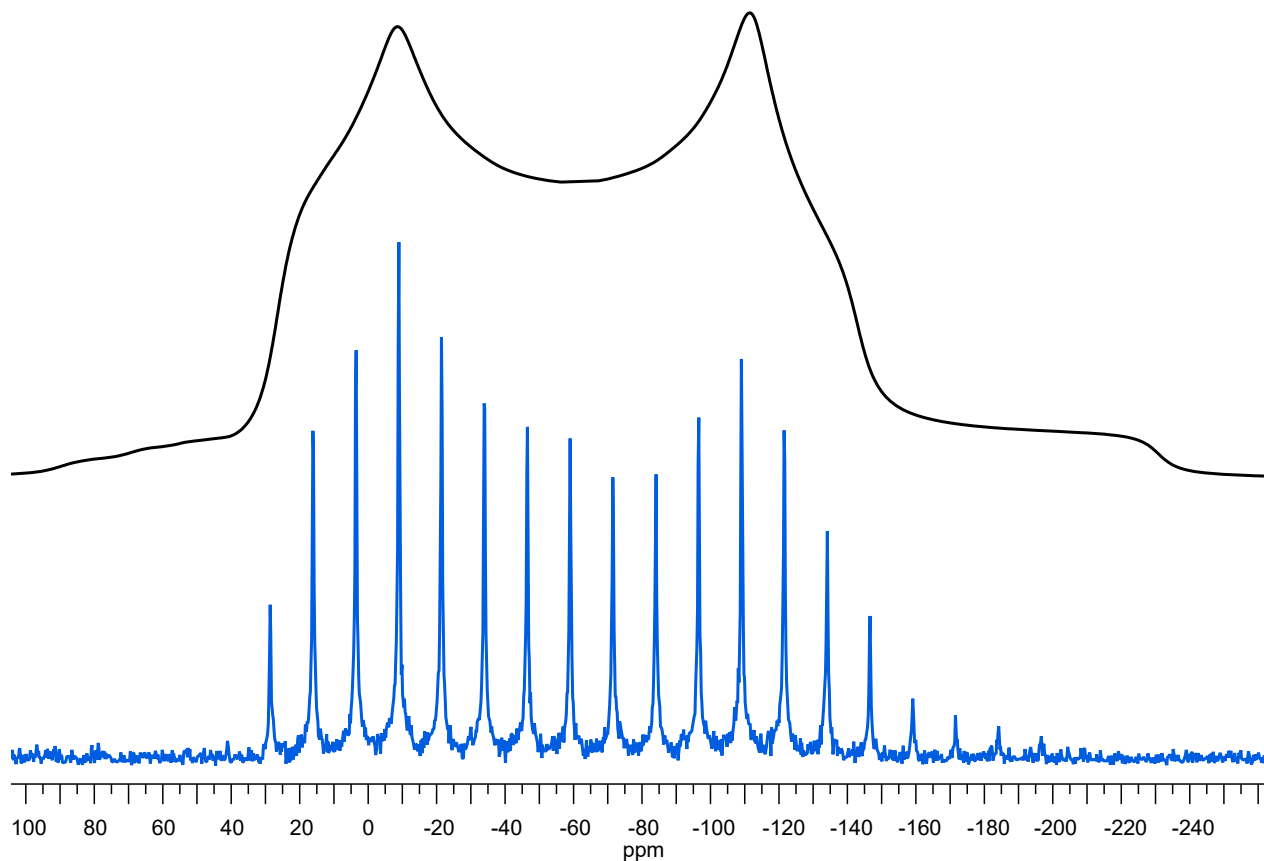

Figure S16:  $^{67}\text{Zn}$  spectra for ZnZ-C18. (Top, Black) Ssnake fitting parameters visualized in TopSpin; (Bottom, Blue) WURST-QCPMG spectrum at 15625 Hz MAS.  $B_0$  19.6 T

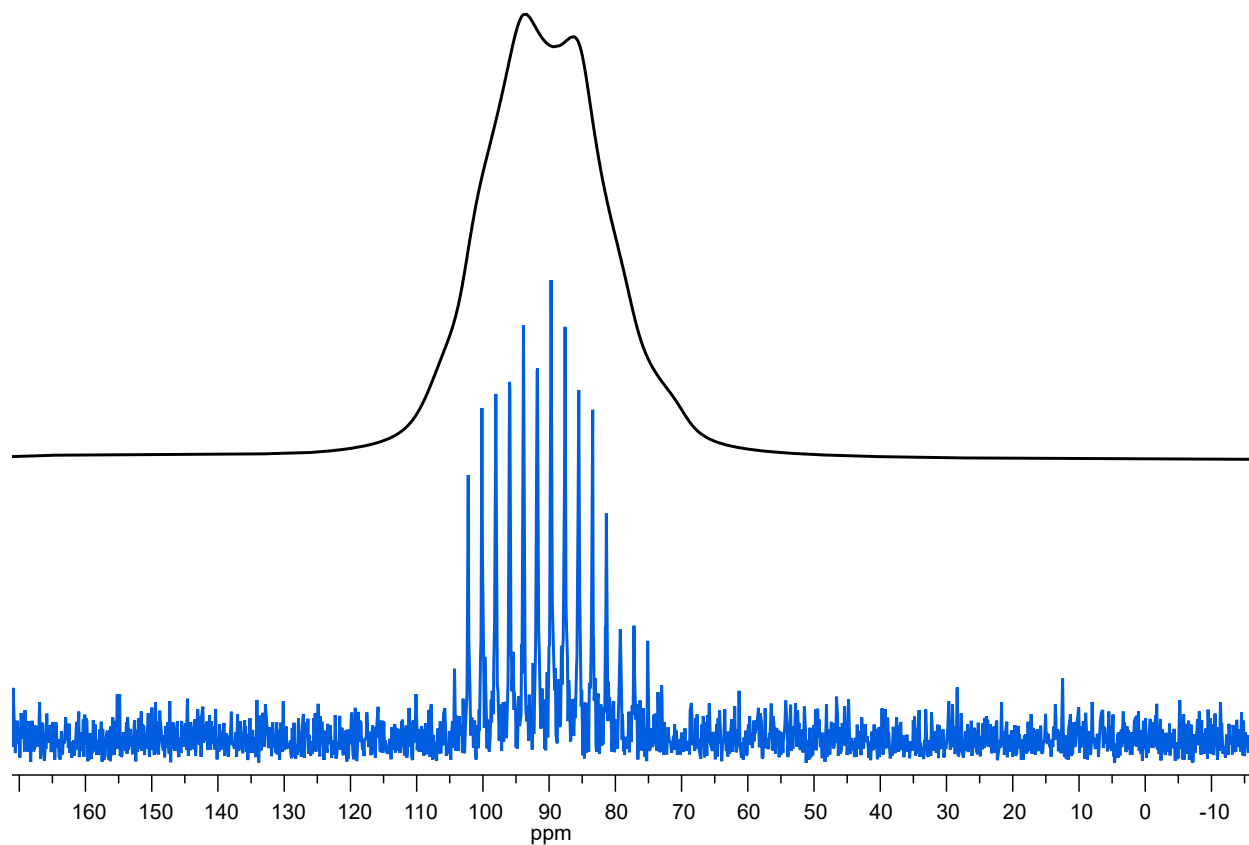

*Figure S17:  $^{67}\text{Zn}$  spectra for  $\text{ZnCl}_2$ . (Top, Black) Ssnake fitting parameters visualized in TopSpin; (Bottom, Blue) WURST-QCPMG spectrum at 15625 Hz MAS.  $B_0$  19.6 T*

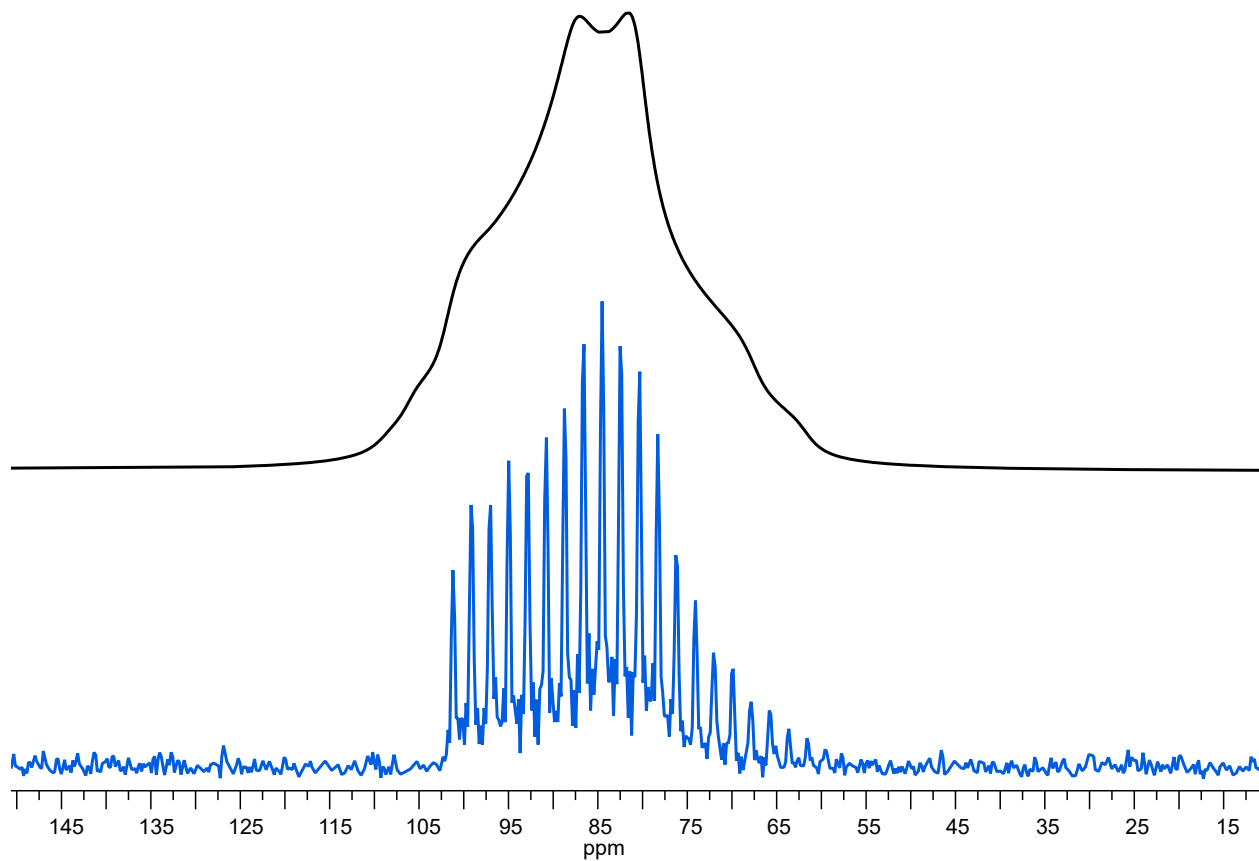

Figure S18:  $^{67}\text{Zn}$  spectra for  $\text{ZnC16}$ . (Top, Black) Ssnake fitting parameters visualized in TopSpin; (Bottom, Blue) WURST-QCPMG spectrum at 15625 Hz MAS.  $B_0$  19.6 T

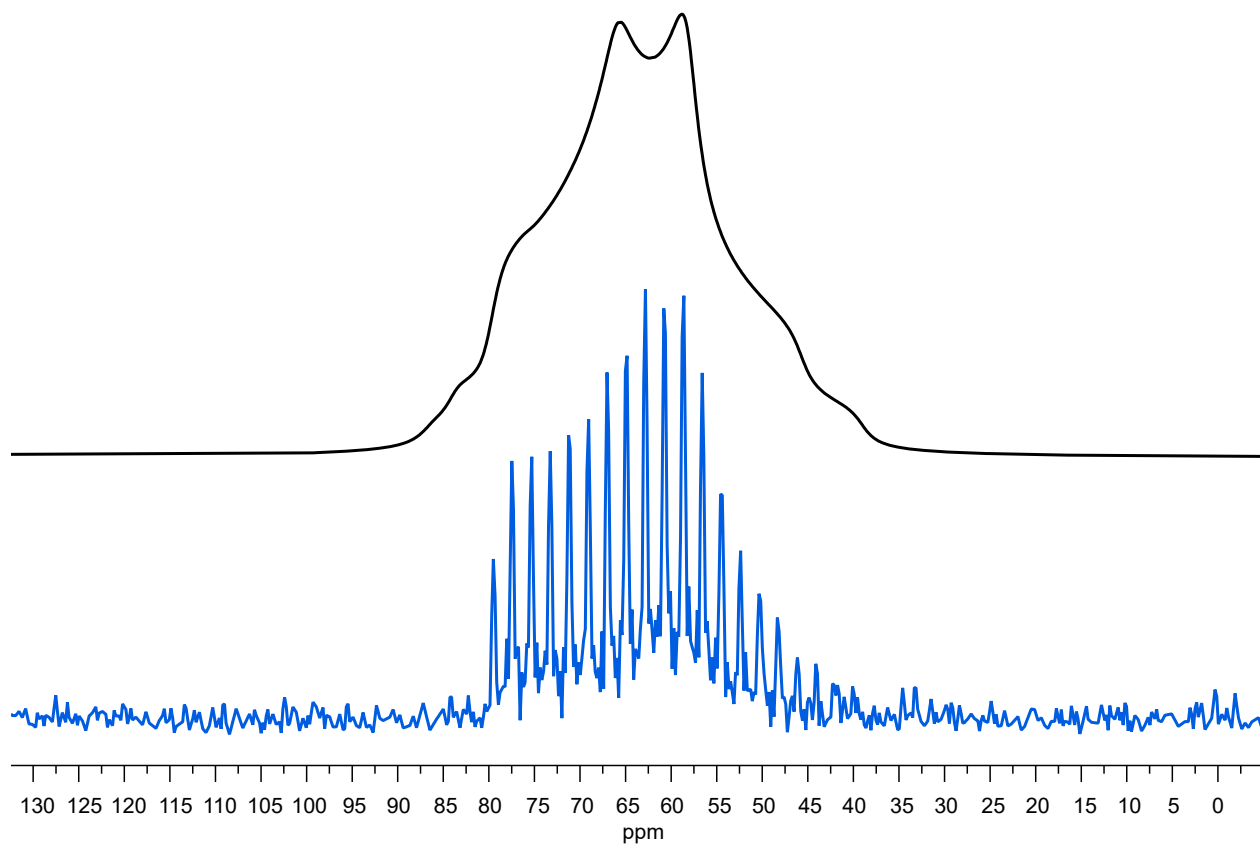

*Figure S19:  $^{67}\text{Zn}$  spectra for  $\text{ZnCl}_8$ . (Top, Black) Ssnake fitting parameters visualized in TopSpin; (Bottom, Blue) WURST-QCPMG spectrum at 15625 Hz MAS.  $B_0$  19.6 T*
